# Supplementary material for: Low cost & quasi solid state Na2Mn0.5Ni0.5Fe(CN)6//NaxFe2O3 hybrid Na-ion batteries for solar energy storage
Source: Royal Society of Chemistry journal article supplement (doi:10.1039/d3se00583f), 2023-01-01
Supplement: d3se00583f1.pdf [file d3se00583f1.pdf]

## Supporting Information

### Low Cost & Quasi Solid State $\text{Na}_2\text{Mn}_{0.5}\text{Ni}_{0.5}\text{Fe}(\text{CN})_6/\text{Na}_x\text{Fe}_2\text{O}_3$ Hybrid Na-Ion Batteries for Solar Energy Storage

Pappu Naskar<sup>a</sup>, Shubhrajyoti Mondal<sup>a</sup>, Biplab Biswas<sup>a</sup>, Sourav Laha<sup>b\*</sup> and Anjan Banerjee<sup>a\*</sup>

<sup>a</sup> Department of Chemistry, Presidency University-Kolkata, Kolkata-700073, India

<sup>b</sup> Department of Chemistry, National Institute of Technology Durgapur, Durgapur-713209, India

## Supporting Tables

**Table S1.** Calculation of Na-ion diffusion coefficient for Mn-PBA and MnNi-PBA.

| Parameter / Unit                                     | Mn-PBA                | MnNi-PBA              |
|------------------------------------------------------|-----------------------|-----------------------|
| <b>R</b> ( $\text{J K}^{-1} \text{mol}^{-1}$ )       | 8.314                 | 8.314                 |
| <b>T</b> (K)                                         | 303                   | 303                   |
| <b>A</b> ( $\text{cm}^2$ )                           | 1                     | 1                     |
| <b>n</b>                                             | 2                     | 1.5                   |
| <b>F</b> (Coulomb $\text{mol}^{-1}$ )                | 96485                 | 96485                 |
| <b>#C</b> ( $\text{mol cm}^{-3}$ )                   | 0.0114                | 0.017                 |
| <b><math>\sigma</math></b> ( $\text{Ohm s}^{-0.5}$ ) | 180                   | <b>77</b>             |
| <b>D</b> ( $\text{cm}^2 \text{s}^{-1}$ )             | $5.4 \times 10^{-16}$ | $4.2 \times 10^{-15}$ |

#C value is calculated from the crystal structures of the active materials, which are established by Rietveld refinement of PXRD data.

For Mn-PBA

Formula unit per unit cell ( $Z$ ) = 2

Unit cell volume =  $582.563 \text{ \AA}^3$

Hence, 4  $\text{Na}^+$  ion present in  $582.563 \text{ \AA}^3$

Therefore, 0.0114 mole  $\text{Na}^+$  ion present in  $1 \text{ cm}^{-3}$

For MnNi-PBA

Formula unit per unit cell ( $Z$ ) = 2

Unit cell volume =  $563.716 \text{ \AA}^3$

Hence, 4  $\text{Na}^+$  ion present in  $563.716 \text{ \AA}^3$

Therefore, 0.017 mole Na<sup>+</sup> ion present in 1 cm<sup>-3</sup>

**Table S2.** Structural parameters and atomic positions obtained from Rietveld refinement of PXRD data on Mn-PBA.

| Atom | site | x        | y         | z        | U <sub>iso</sub> | Occupancy |
|------|------|----------|-----------|----------|------------------|-----------|
| Mn   | 2a   | 0.5      | 0.5       | 0.5      | 0.004(4)         | 1.0       |
| Fe   | 2d   | 0.5      | 0         | 1.0      | 0.024(5)         | 0.99(2)   |
| Na   | 4e   | 0.240(4) | 0.481(10) | 0.051(9) | 0.066(9)         | 0.93(1)   |
| N    | 4e   | 0.544(4) | 0.286(7)  | 0.811(6) | 0.034(6)         | 1.0       |
| N    | 4e   | 0.285(4) | 0.574(6)  | 0.484(6) | 0.034(6)         | 1.0       |
| N    | 4e   | 0.505(6) | 0.266(7)  | 0.306(5) | 0.034(6)         | 1.0       |
| C    | 4e   | 0.524(6) | 0.181(7)  | 0.847(7) | 0.034(6)         | 1.0       |
| C    | 4e   | 0.188(4) | 0.491(10) | 0.530(6) | 0.034(6)         | 1.0       |
| C    | 4e   | 0.509(6) | 0.178(7)  | 0.199(7) | 0.034(6)         | 1.0       |
| O    | 4e   | 0.294(4) | 0.181(7)  | 0.279(7) | 0.058(6)         | 0.84(3)   |

Space group  $P2_1/n$ ,  $a = 10.591(1) \text{ \AA}$ ,  $b = 7.525(2) \text{ \AA}$ ,  $c = 7.318(1) \text{ \AA}$ ,  $\beta = 92.24(2)^\circ$

Reliability Factors:  $R_p = 6.04\%$ ,  $R_{wp} = 7.48\%$ ,  $\chi^2 = 0.84$

**Table S3.** Structural parameters and atomic positions obtained from Rietveld refinement of PXRD data on MnNi-PBA.

| Atom         | site | x        | y        | z        | $U_{\text{iso}}$ | Occupancy |
|--------------|------|----------|----------|----------|------------------|-----------|
| <b>Mn/Ni</b> | 2a   | 0.5      | 0.5      | 0.5      | 0.013(3)         | 0.5/0.5   |
| <b>Fe</b>    | 2d   | 0.5      | 0        | 1.0      | 0.044(5)         | 0.99(2)   |
| <b>Na</b>    | 4e   | 0.292(2) | 0.460(4) | 0.001(4) | 0.076(6)         | 0.99(3)   |
| <b>N</b>     | 4e   | 0.497(8) | 0.288(8) | 0.748(9) | 0.031(4)         | 1.0       |
| <b>N</b>     | 4e   | 0.287(4) | 0.538(8) | 0.518(8) | 0.031(4)         | 1.0       |
| <b>N</b>     | 4e   | 0.504(6) | 0.318(7) | 0.289(8) | 0.031(4)         | 1.0       |
| <b>C</b>     | 4e   | 0.479(8) | 0.202(8) | 0.815(8) | 0.031(4)         | 1.0       |
| <b>C</b>     | 4e   | 0.189(4) | 0.452(9) | 0.530(8) | 0.031(4)         | 1.0       |
| <b>C</b>     | 4e   | 0.467(8) | 0.182(8) | 0.194(9) | 0.031(4)         | 1.0       |
| <b>O</b>     | 4e   | 0.246(7) | 0.216(6) | 0.284(7) | 0.034(11)        | 1.00(4)   |

Space group  $P2_1/n$ ,  $a = 10.413(2) \text{ \AA}$ ,  $b = 7.470(2) \text{ \AA}$ ,  $c = 7.253(3) \text{ \AA}$ ,  $\beta = 91.13(2)^\circ$

Reliability Factors:  $R_p = 3.13\%$ ,  $R_{wp} = 3.99\%$ ,  $\chi^2 = 0.79$

Supporting Figures

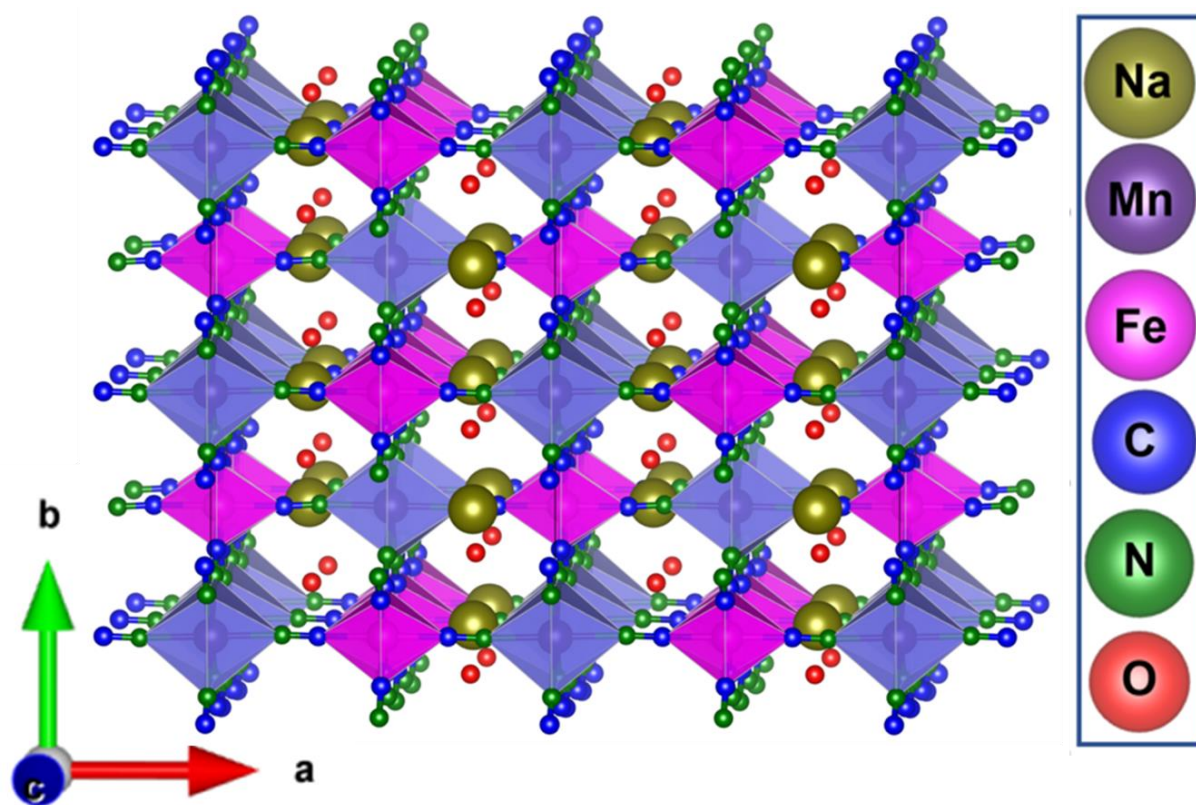

**Fig. S1:** Crystal structure of Mn-PBA in monoclinic phase (viewed along the crystallographic c direction).

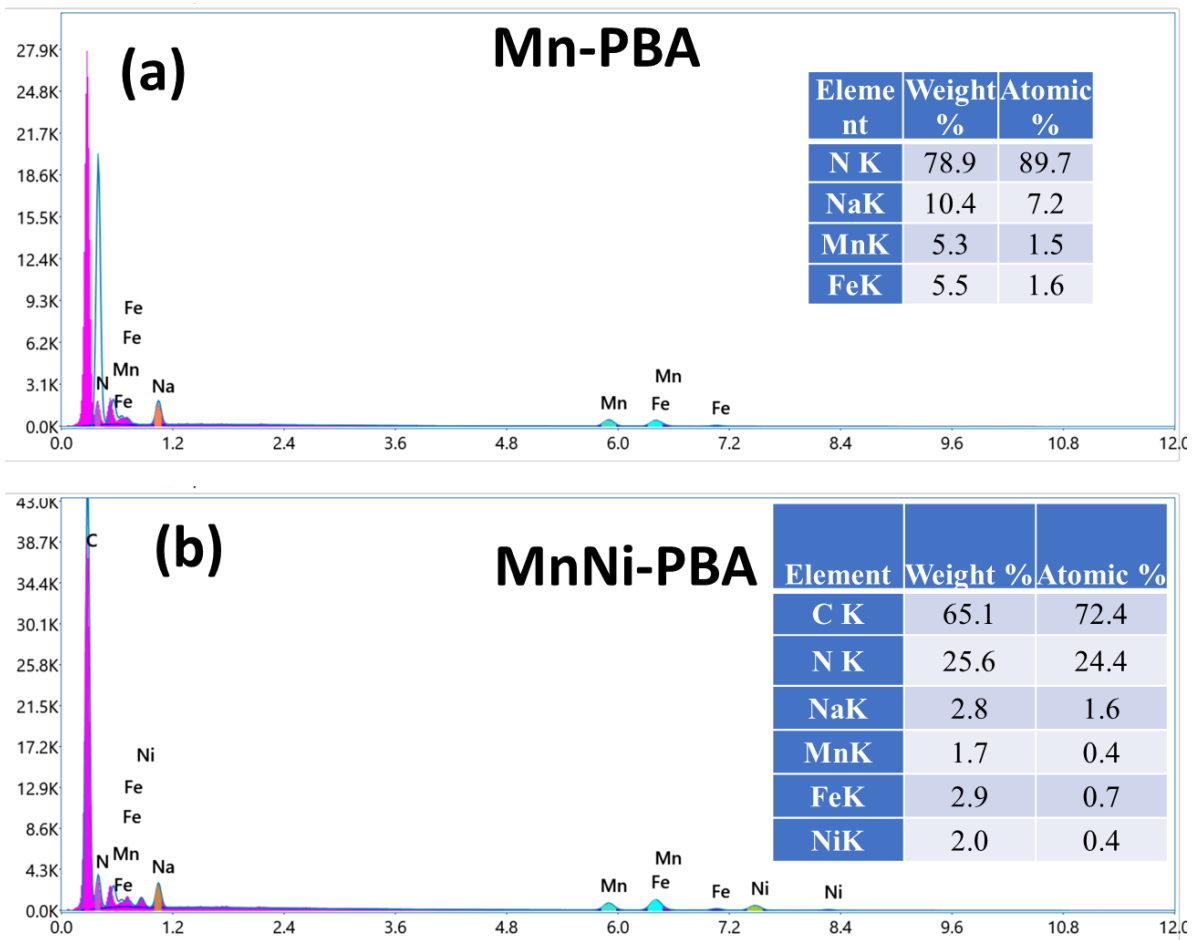

**Fig. S2:** EDX analysis of (a) Mn-PBA and (b) MnNi-PBA.

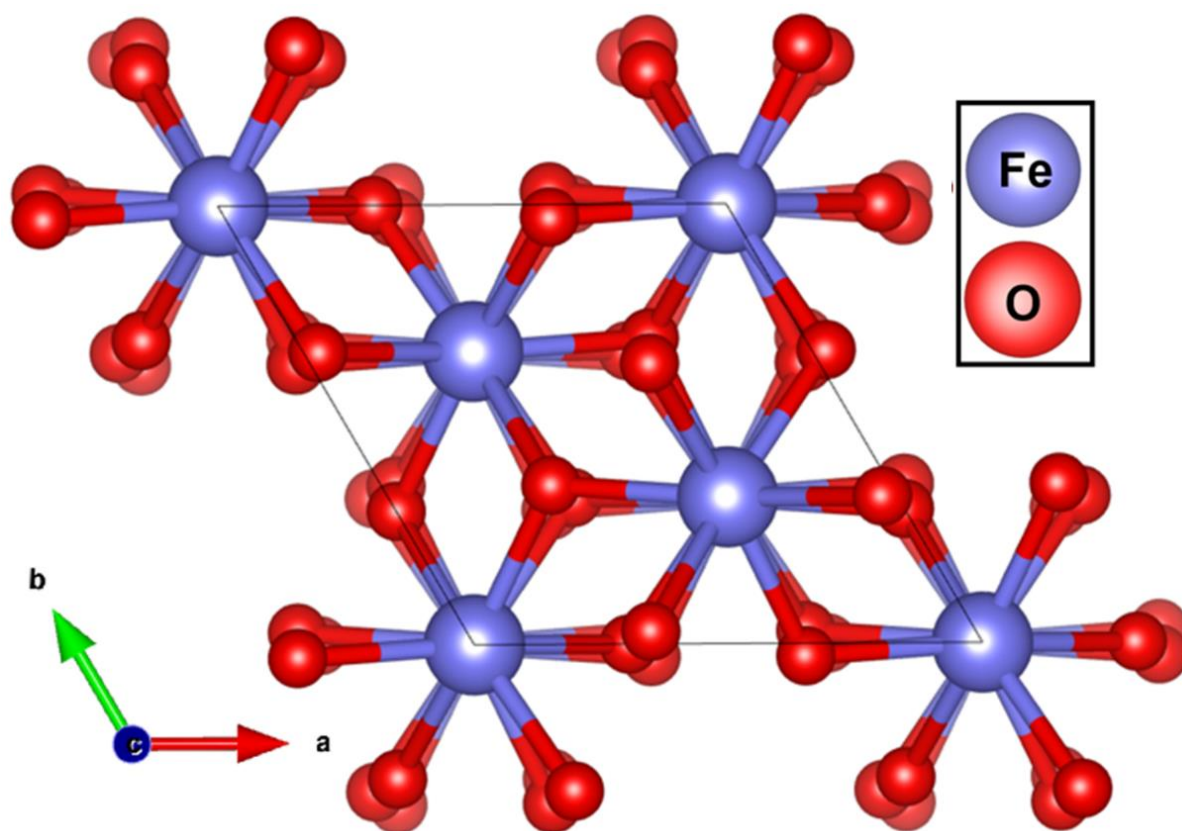

**Fig. S3:** Crystal structure of Fe<sub>2</sub>O<sub>3</sub> in rhombohedral phase (viewed along the crystallographic c direction).

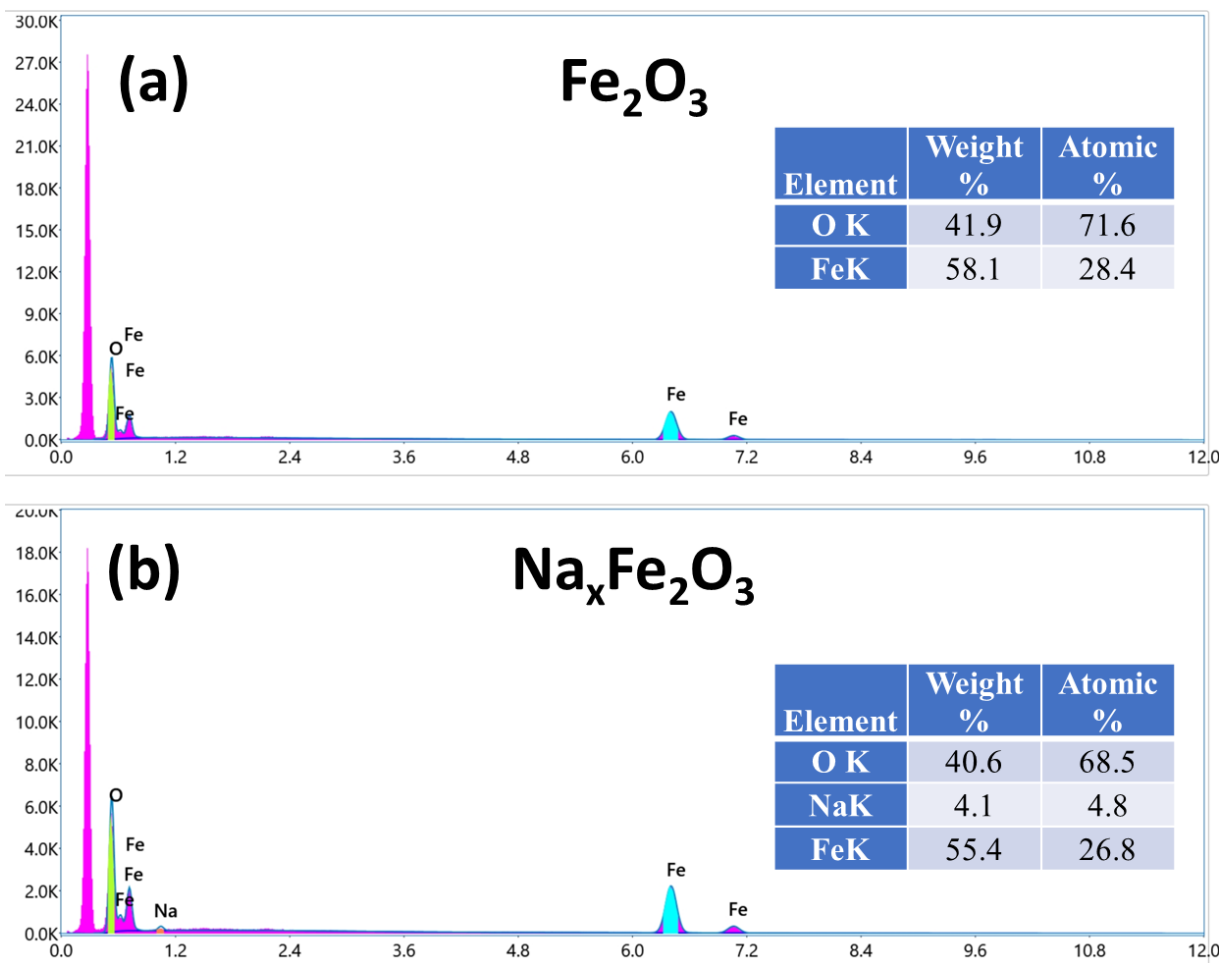

**Fig. S4:** EDX analysis of (a)  $\text{Fe}_2\text{O}_3$  and (b)  $\text{Na}_x\text{Fe}_2\text{O}_3$ .

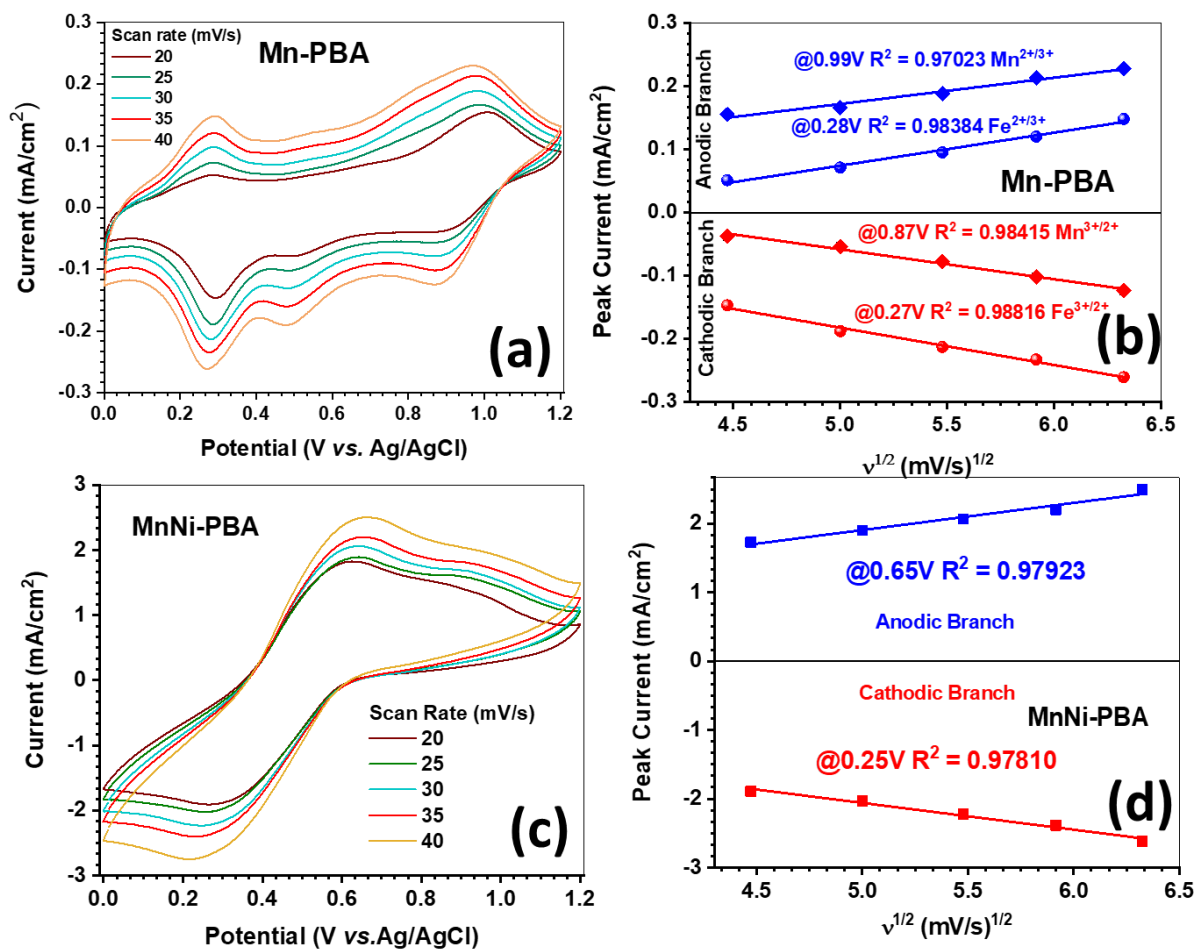

**Fig. S5:** (a) CV profiles of Mn-PBA at variable scan rates, (b) peak current vs. square root of scan rate profiles of Mn-PBA, (c) CV profiles of MnNi-PBA at variable scan rates, (d) peak current vs. square root of scan rate profiles of MnNi-PBA.



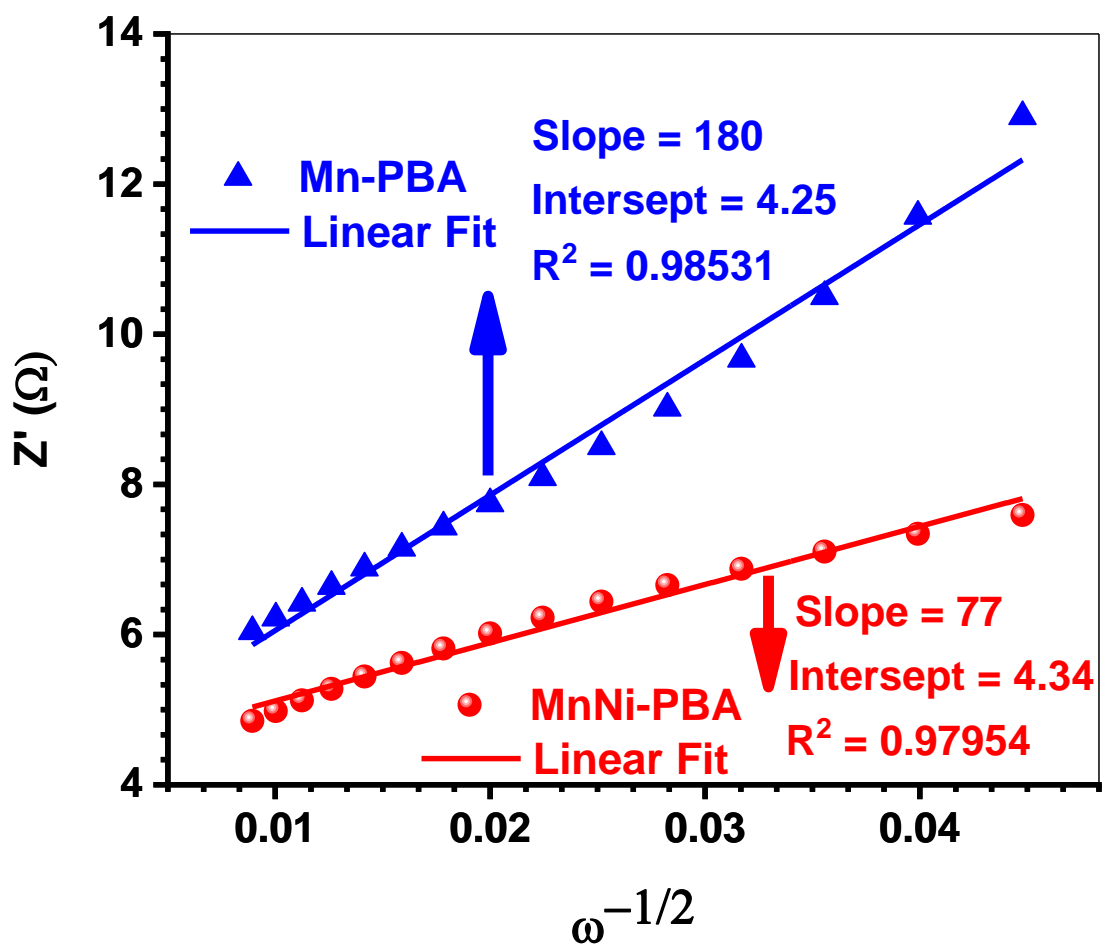

**Fig. S6:** linear relationship between  $Z'$  and  $\omega^{-1/2}$  at low-frequency region in EIS ( $\omega$  = angular frequency) for Mn-PBA and MnNi-PBA.

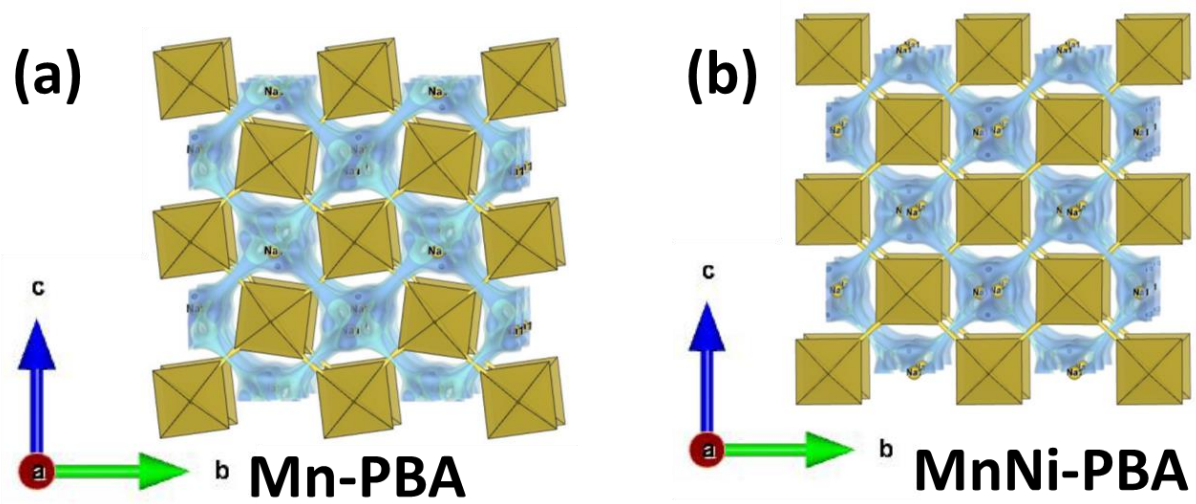

**Fig. S7:** Na-ion diffusion pathways in the b-c plane as viewed along the crystallographic a-direction:

(a) Mn-PBA and (b) MnNi-PBA.

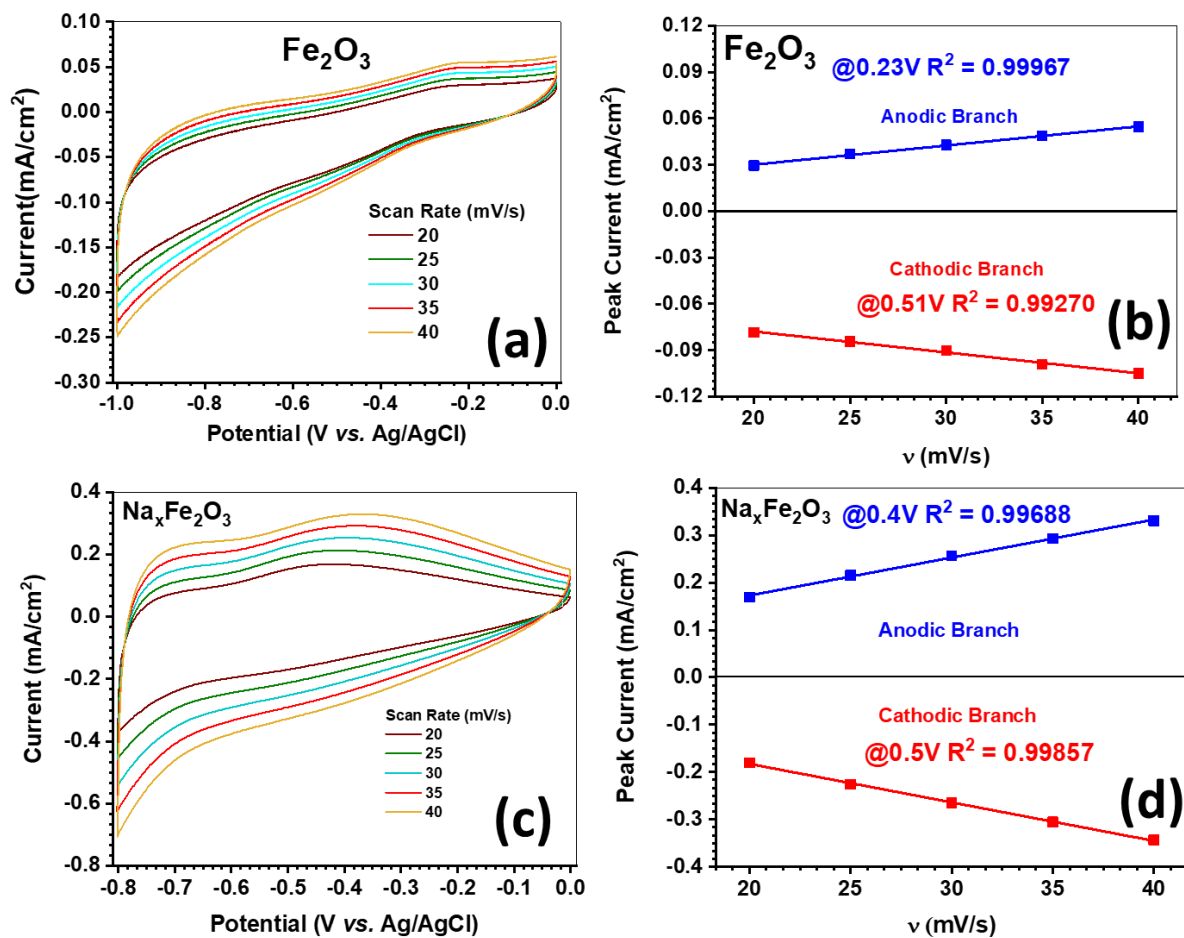

**Fig. S8:** (a) CV profiles of  $\text{Fe}_2\text{O}_3$  at variable scan rates, (b) peak current vs. scan rate profiles of  $\text{Fe}_2\text{O}_3$ , (c) CV profiles of  $\text{Na}_x\text{Fe}_2\text{O}_3$  at variable scan rates, (d) peak current vs. scan rate profiles of  $\text{Na}_x\text{Fe}_2\text{O}_3$ .

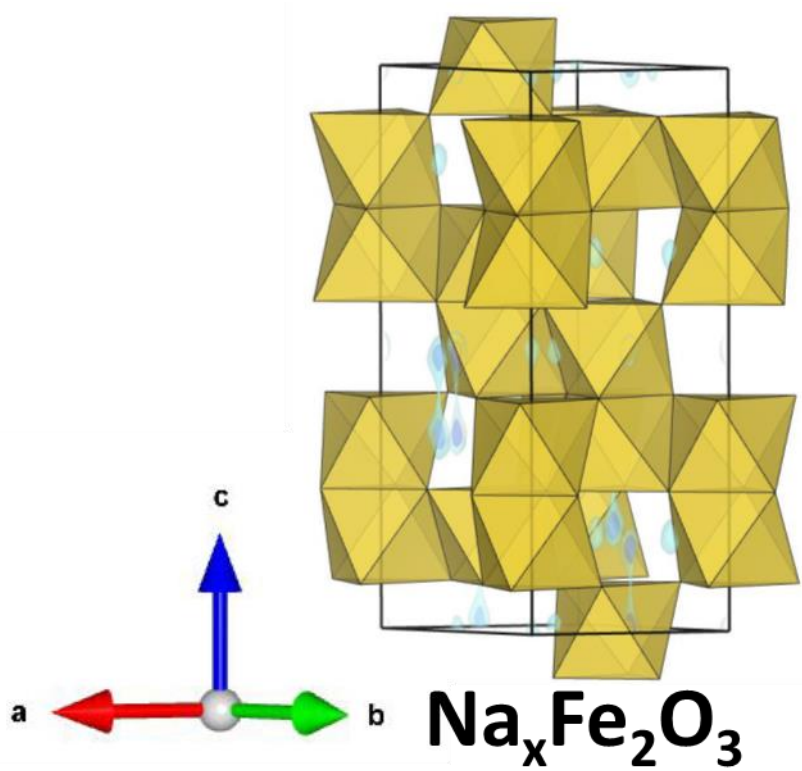

**Fig. S9:** Na-ion diffusion pathway in  $\text{Na}_x\text{Fe}_2\text{O}_3$ .

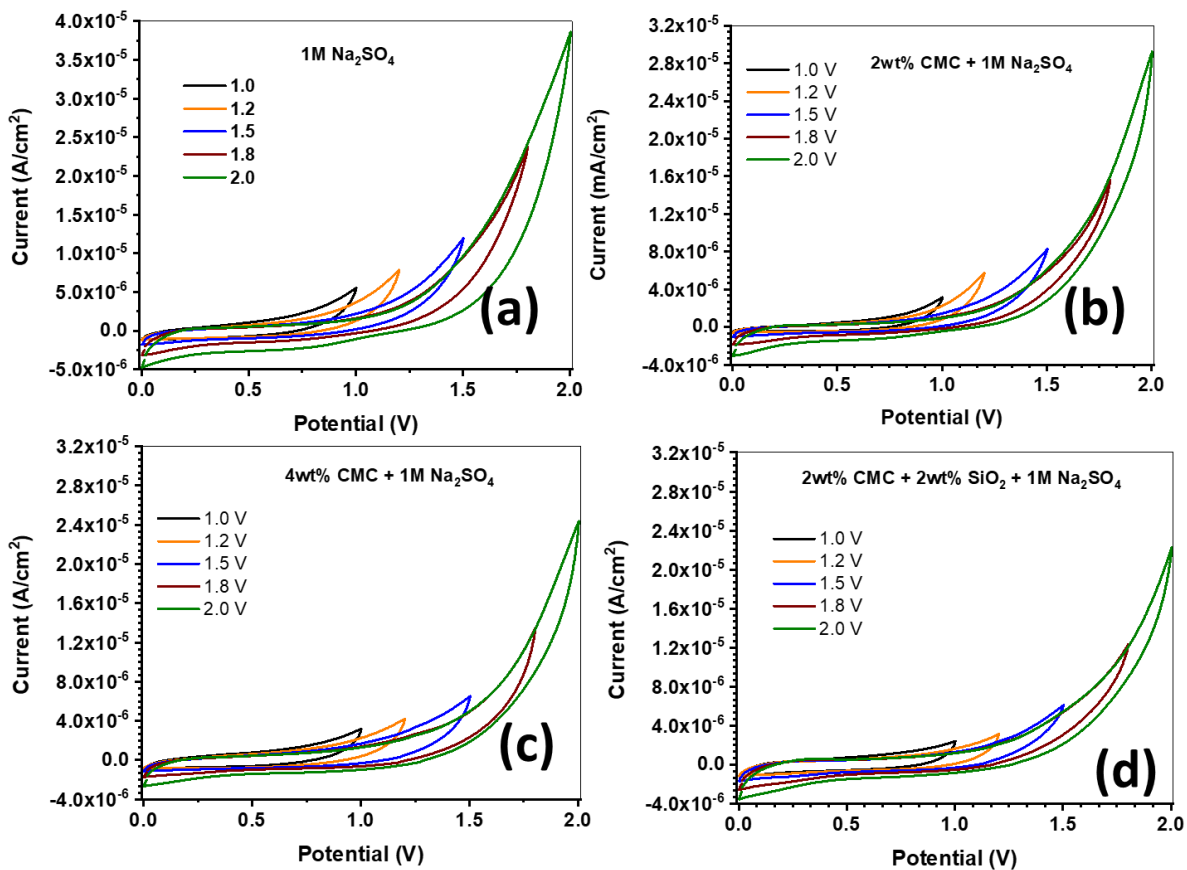

**Fig. S10:** CV profiles at  $10 \text{ mV s}^{-1}$  scan rate of symmetric cells with  $1 \text{ M Na}_2\text{SO}_4$  aqueous electrolyte under (a) flooded, (b) 2 wt% CMC gel, (c) 4 wt% CMC gel and (d) 2 wt% CMC + 2 wt%  $\text{SiO}_2$  hybrid gel mediums.

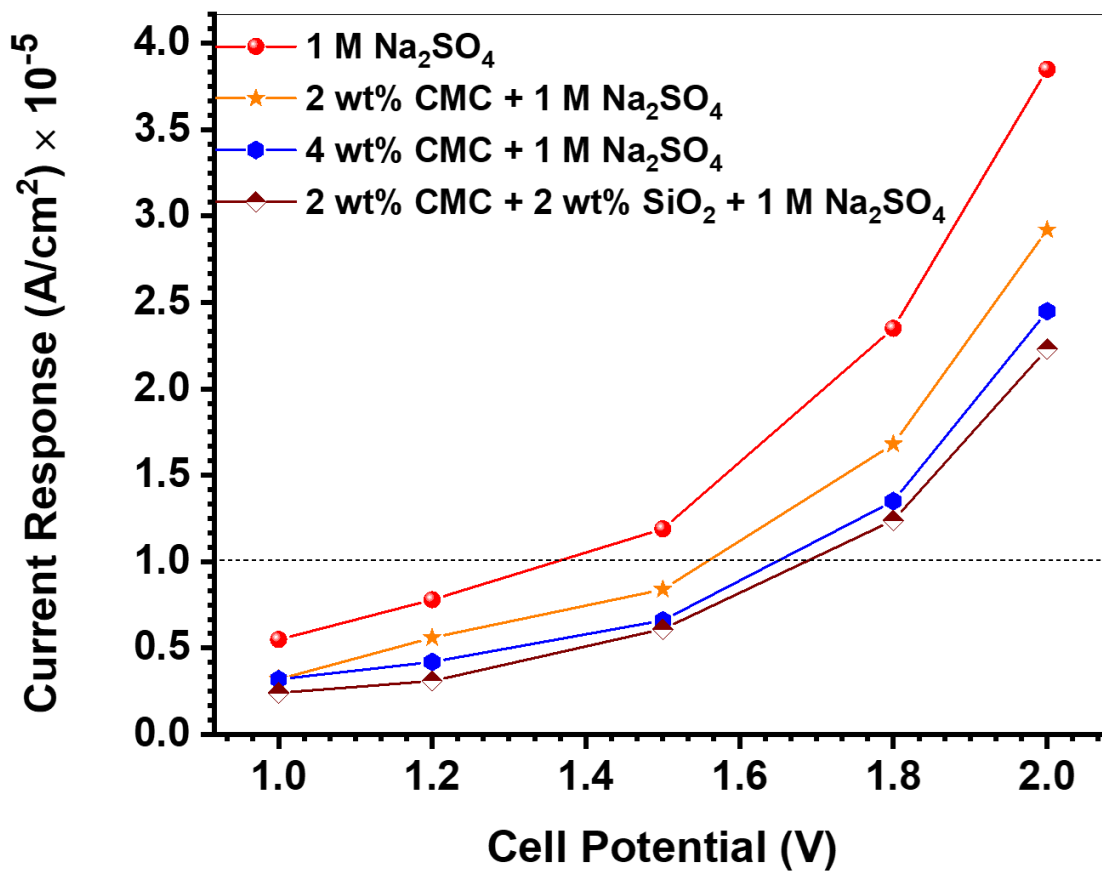

**Fig. S11:** Current response at various cell potentials of symmetric cells with various electrolyte mediums. Data recorder for this figure from Fig. S8.

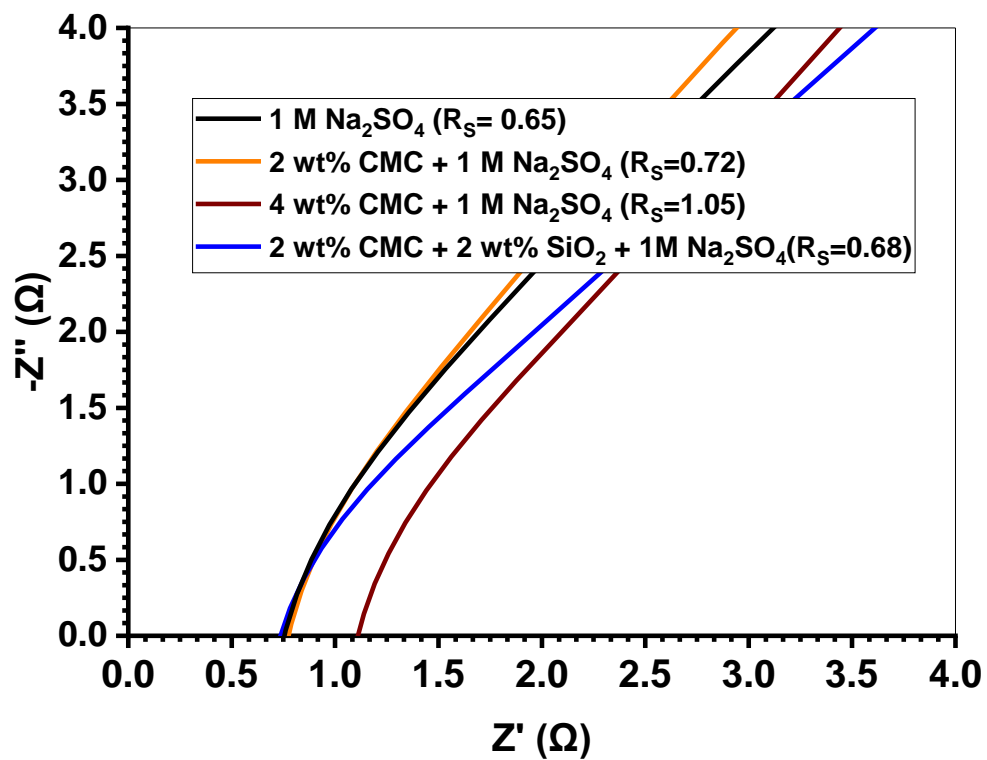

**Fig. S12:** Nyquist plots of the symmetric cells with various electrolyte mediums.
